# Supplementary material for: Co-expression of mitosis-regulating genes contributes to malignant progression and prognosis in oligodendrogliomas
Source: PubMed Central journal article supplement (PMC4741997; doi:10.18632/oncotarget.5499), 2015-10-12
Supplement: oncotarget-06-38257-s001.pdf [file oncotarget-06-38257-s001.pdf]

SUPPLEMENTARY FIGURES AND TABLES

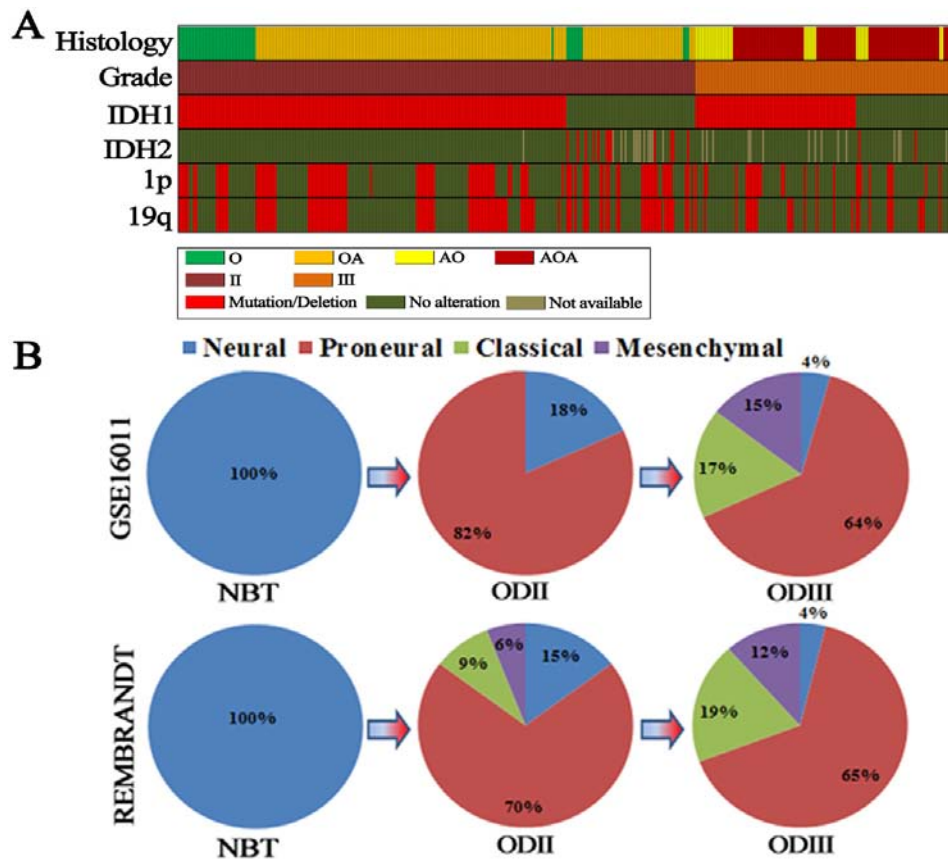

**Supplementary Figure S1: Overview of molecular aberrations and molecular classification in ODs.** **A.** Distribution of *IDH1/2* and LOH1p/19q in ODs of CGGA dataset (248 ODII and 125 ODIII). **B.** Distribution of the TCGA subtypes in different grades of ODs from the GSE16011 (8 NBTs, 8 ODII and 44 ODIII) and REMBRANDT (21 NBTs, 30 ODII and 23 ODIII) datasets.

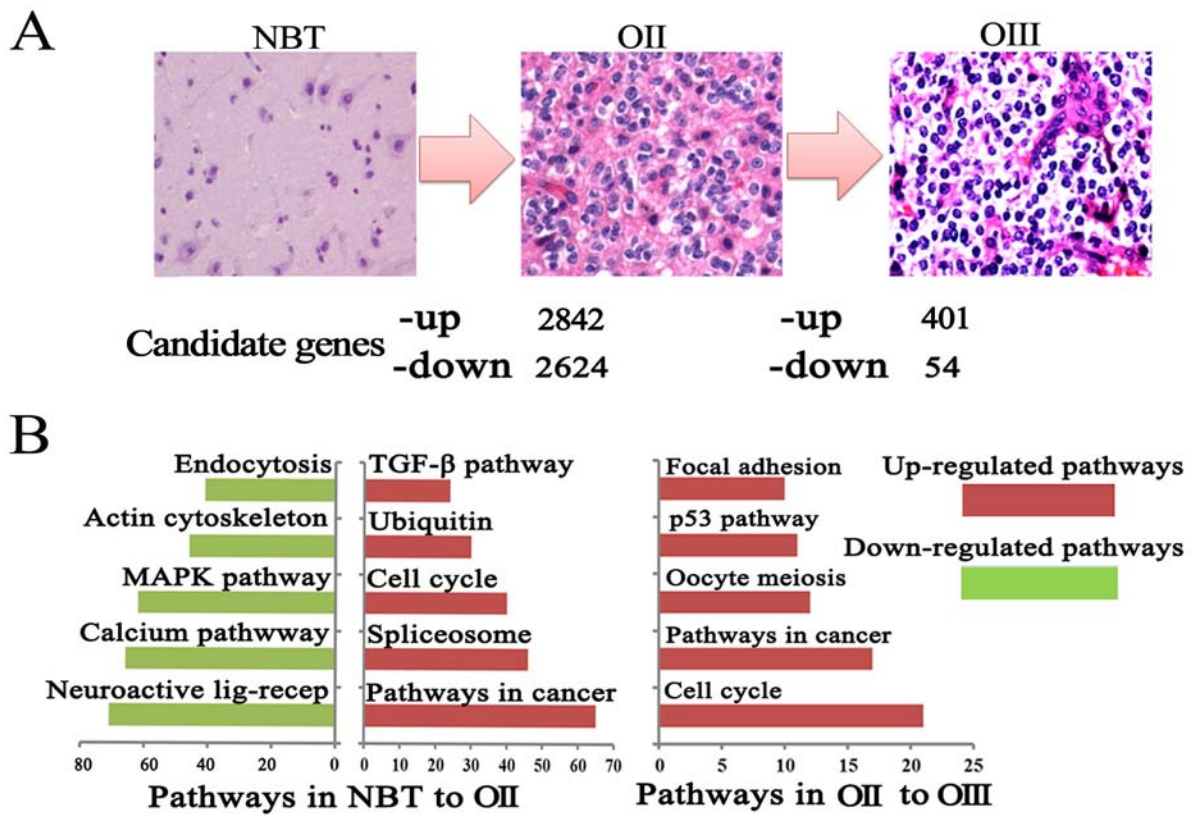

**Supplementary Figure S2: Number of differentially expressed genes (upregulated and downregulated) with increasing tumor grades.** A. These genes were identified by analysis of the overlapping data from the three datasets ( $p < 0.05$ ). B. Gene-set enrichment analysis was performed using a functional annotation tool (DAVID).

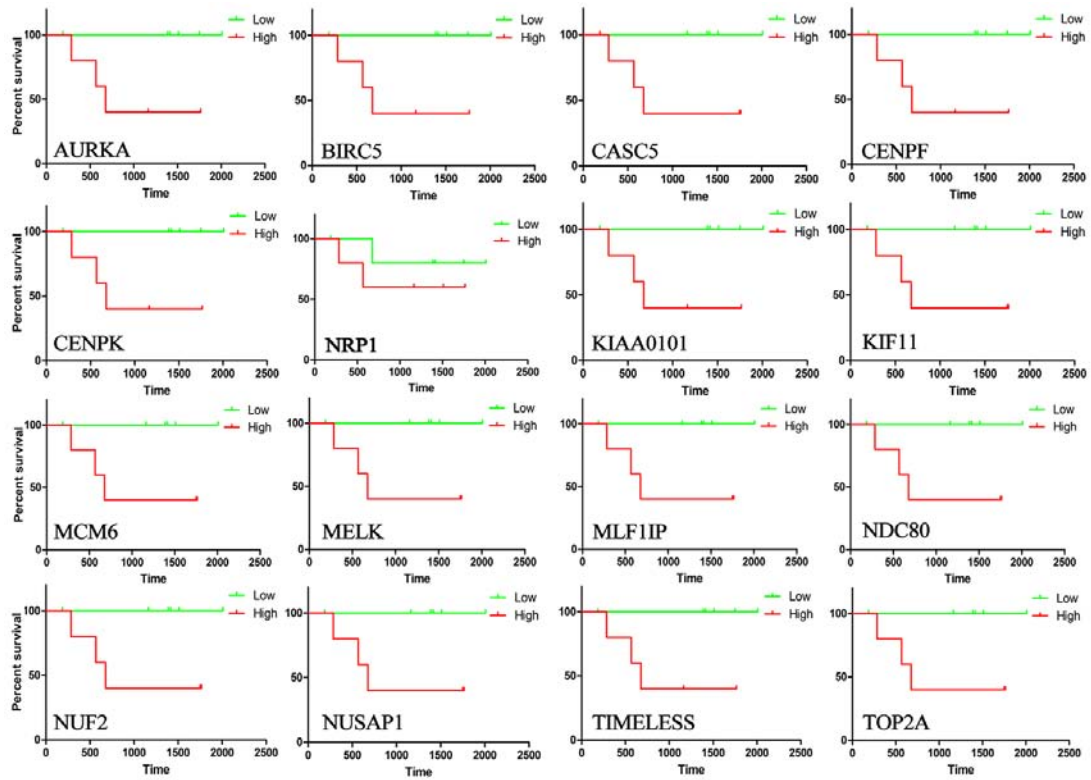

Supplementary Figure S3: Kaplan–Meier survival analysis identifying the correlation between the sixteen candidate genes and the survival of patients with OII based on the CGGA dataset (11 OIIs).

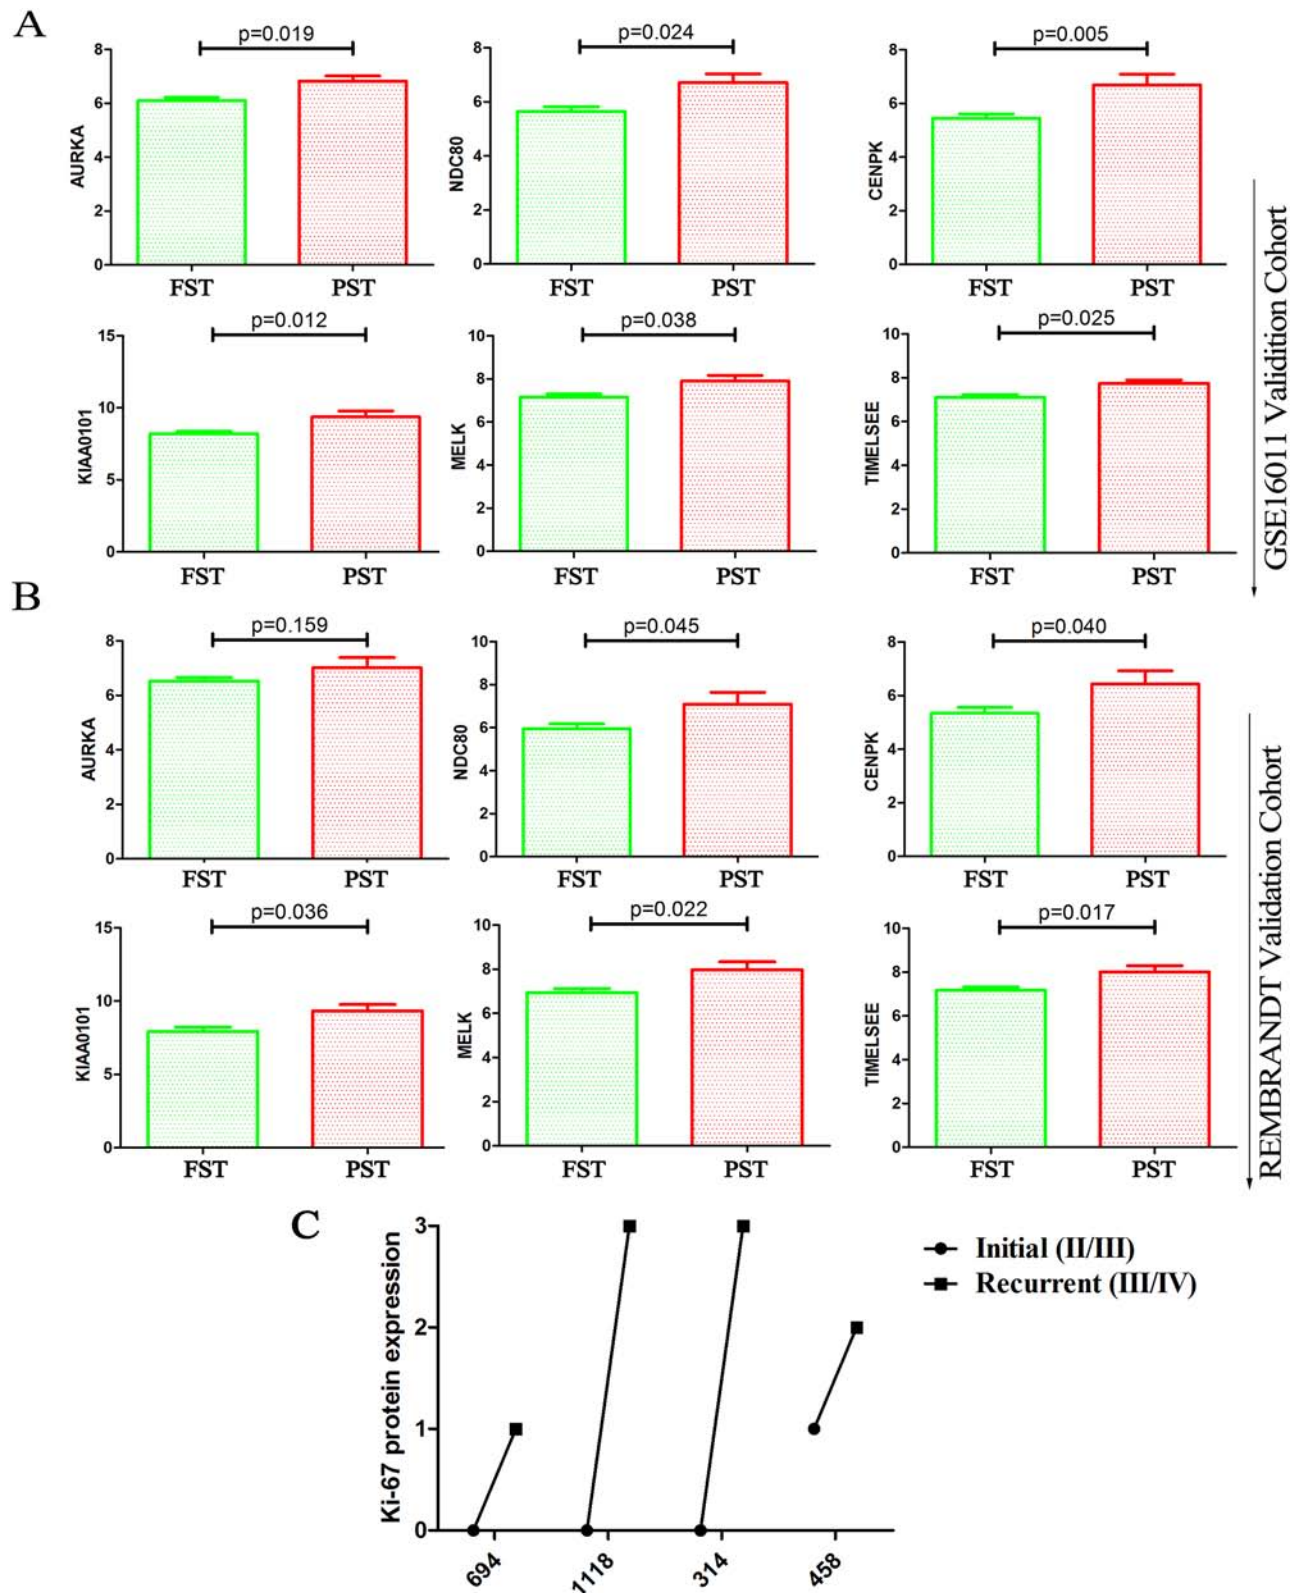

**Supplementary Figure S4: Candidate genes were associated with TCGA subtypes. A. and B.** The relationship between the candidate genes and the TCGA subtypes was validated on the GSE16011 and REMBRANDT datasets. **C.** The recurrent tumors contained the ki-67 protein is higher than those observed in the initial tumors ( $p = 0.02$ )

**Supplementary Table S1: The numbers of samples with microarray and RNA-seq**

| Datasets  | Microarray (number) |     |      | Total | RNA-seq (number) |      | Total |
|-----------|---------------------|-----|------|-------|------------------|------|-------|
|           | NBT                 | OII | OIII |       | OII              | OIII |       |
| CGGA      | 5                   | 17  | 11   | 33    | 27               | 11   | 38    |
| GSE16011  | 8                   | 8   | 44   | 60    | –                | –    |       |
| REMBRANDT | 21                  | 30  | 23   | 74    | –                | –    |       |
| TCGA      | –                   | –   | –    | –     | 64               | 41   | 105   |
| Total     | 34                  | 55  | 78   | 167   | –                | –    | –     |

NBT: Normal Brain Tissue; OII/III: Oligodendroglioma grade II/III

**Supplementary Table S2: The list of differentially expressed genes in three datasets.**

**See Supplementary File\_S1**

**Supplementary Table S3: The primers of candidate genes**

| Genes    | Forward Primer (5' → 3') | Reverse Primer (5' → 3') |
|----------|--------------------------|--------------------------|
| AURKA    | CAGGCAACCAGTGTACCTCATCC  | GGCGACCAATTTCAAAGTCTTCC  |
| NDC80    | AAATCAAGGACCCGAGACCACT   | GGCACAGGAAGCCATAAAGAAA   |
| KIAA0101 | CTAATTCGACATCAGTTTCATCG  | TCAGAATCTTTAGGGGACAACC   |
| TIMELESS | TGAGGAAGACAGCGAAGAGGAA   | GAGCCATAGGAGCGGGATAGAA   |
| MELK     | TGTTGAGTGGCAAAGCAAGAATC  | AGCAGAAGATAGGTAGCCGTGAG  |
| CENPK    | AAACACTCACCGATTCAAATGC   | GAGAACGTCTTCAGTCAAGGGA   |
| ACTIN    | TGACCCAGATCATGTTTGAGA    | TACGGCCAGAGGCGTACAG      |
